# Supplementary material
Source: ML conference proceedings conference paper supplement (https://openaccess.thecvf.com/content/CVPRW_2020/html/Lee_Infinitesimal_Drift_Diffeomorphometry_CVPRW_2020_paper.html)
Supplement: Supplementary file 1 [file Lee_Infinitesimal_Drift_Diffeomorphometry_CVPRW_2020_supplemental.pdf]

# Supplementary Materials: Infinitesimal Drift Diffeomorphometry Models for Population Shape Analysis

Brian C. Lee<sup>1</sup>, Daniel J. Tward<sup>1</sup>, Zhiyi Hu<sup>1</sup>, Alain Trouvé<sup>2</sup>, Michael I. Miller<sup>1</sup>

<sup>1</sup>Johns Hopkins University, Baltimore, MD, USA

<sup>2</sup>Université Paris-Saclay, ENS Paris-Saclay, CNRS, Centre Borelli, F-94235, Cachan, France

<sup>1</sup>{leebc, dtward, zhiyi, mim}@cis.jhu.edu, <sup>2</sup>trouve@cmla.ens-cachan.fr

## A. Current Matching Norm on Surfaces

A template subcortical gray matter structure is represented by a discrete triangulated surface, a set of  $n$  points and a triangulation of  $n_f$  faces, the  $j$ -th face consists of three ordered points from  $q_1$  with indices denoted  $f(j, 1), f(j, 2), f(j, 3)$ . An invariant cost function to sampling is based on current matching which is minimized when surfaces and normals are close. We define face centers  $c(j) = [q_1(f(j, 1)), q_1(f(j, 2)), q_1(f(j, 3))]/3$  and area weighted normals  $A(j) = [q_1(f(j, 2)) - q_1(f(j, 1))] \times [q_1(f(j, 3)) - q_1(f(j, 1))]/2$  for  $\times$  the cross product in  $\mathbb{R}^3$  and  $j \in \{1, \dots, n_f\}$ . The same notation is used for target surfaces, which may have a different number of faces or vertices:

$$\begin{aligned} \|S - S'\|^2 = & \frac{1}{2\sigma^2} \left( \sum_{i,j=1}^{n_f} A^T(i)K(c(i), c(j))A(j) \right. \\ & - 2 \sum_{i=1}^n \sum_{j=1}^{n_f} A^T(i)K(c(i), c'(j))A'(j) \\ & \left. + \sum_{i,j=1}^{n_f} A'^T(i)K(c'(i), c'(j))A'(j) \right) \quad (1) \end{aligned}$$

with  $K$  a kernel defined similarly to that above.
